# Supplementary material for: There You Are! Automated Detection of Indris’ Songs on Features Extracted from Passive Acoustic Recordings
Source: MDPI journal article supplement (doi:10.3390/ani13020241), 2023-01-09
Supplement: s1 [file s1]

Supplementary Materials

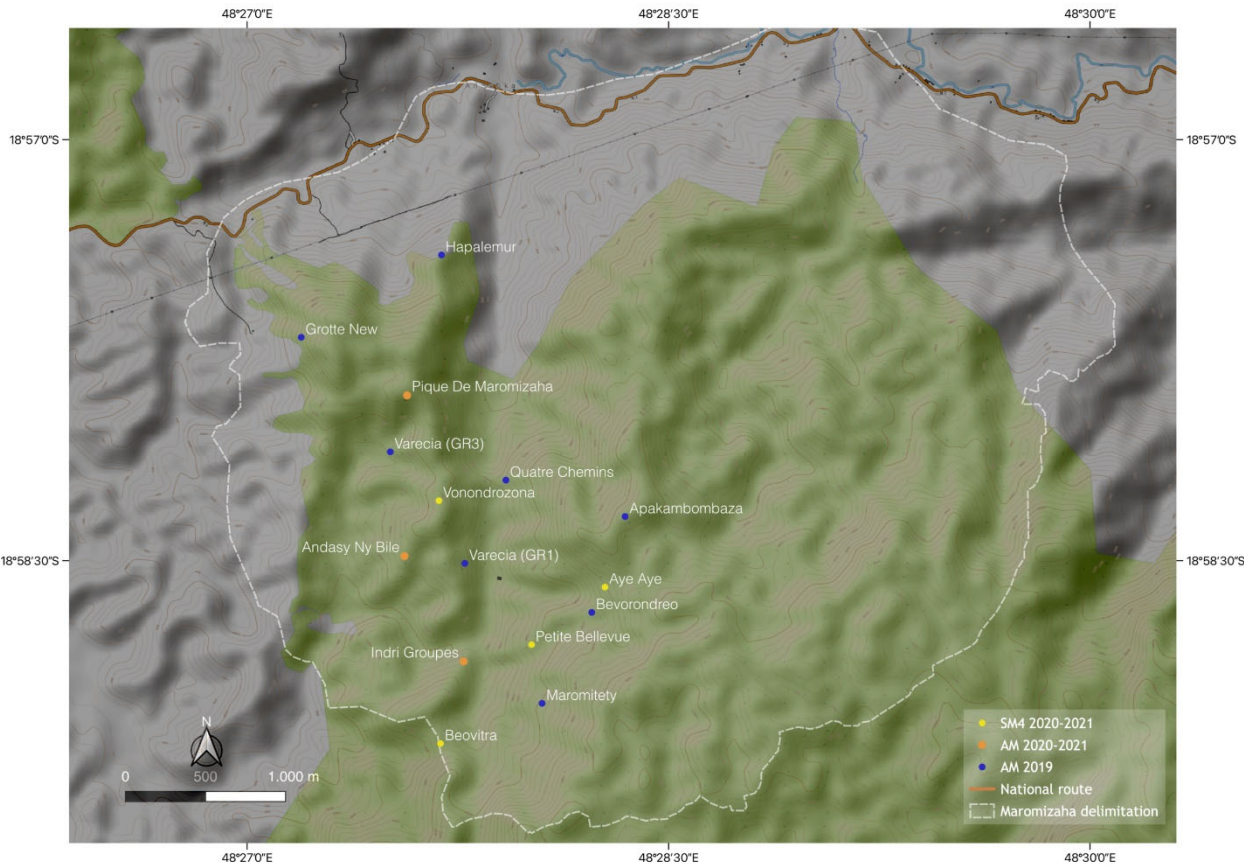

**Figure S1:** The coordinates of the sites chosen for the recordings of the three datasets are plotted on the map of the Maromizaha New Protected Area; the forested area is shaded in green.

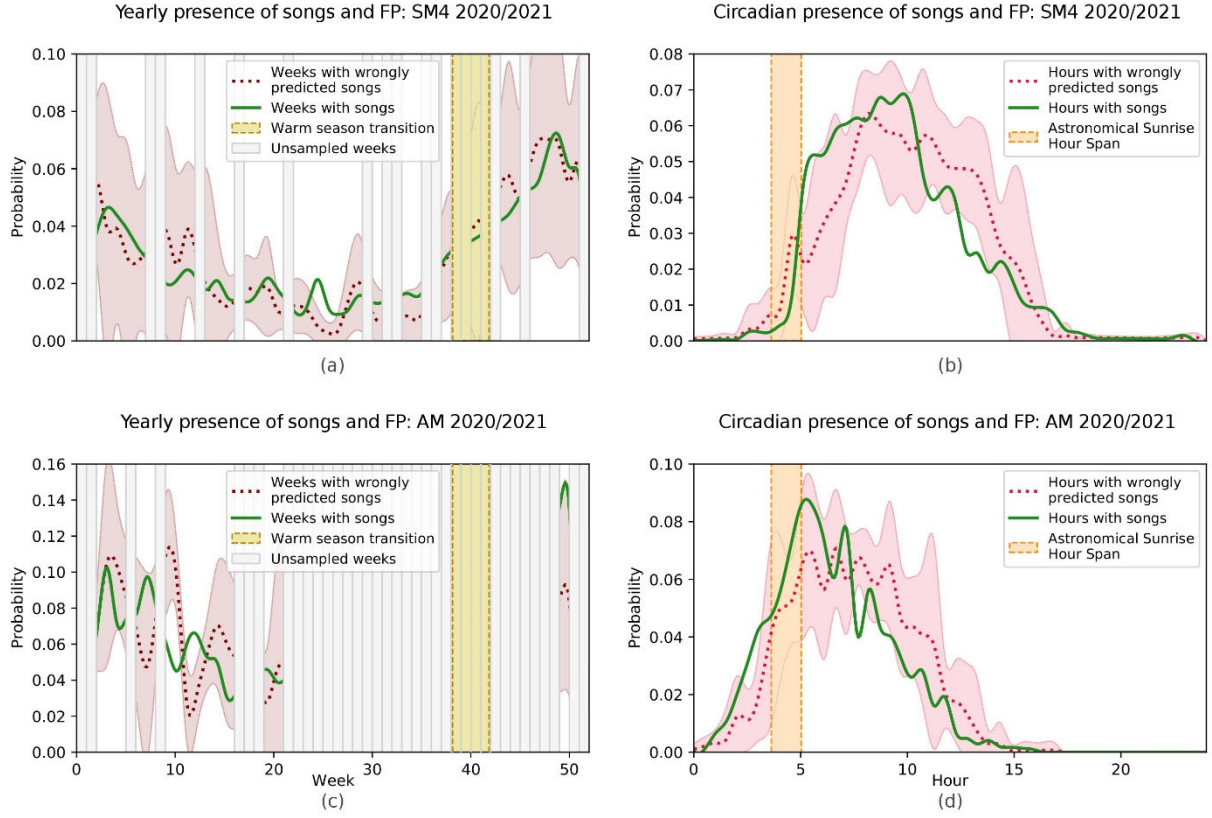

**Figure S2:** Yearly and circadian trends of the presence of songs and songs' predictions that did not contain any song (False Positives). **a)** and **b)** report data for the SM4 2020/2021 dataset; **c)** and **d)** report data for the AM 2020/2021 dataset. We considered a week unsampled if less than 250 recordings ( $\approx 40$  hours) were present; we did not use recordings of unsampled weeks to compute the probabilities for plots **a)** and **c)**, related to yearly trends, while we did employ all recordings for plots **b)** and **d)**, related to circadian trends. In the plots representing the yearly trend, we highlighted the typical period that presents a transition between the cold and the warm season [35], while for those concerning the circadian trends, we highlighted the astronomical sunrise hour span [54]. Dotted lines and shaded areas represent respectively the mean and the area comprise between three standard deviations obtained from the ten iterations of cross-validation. We reported the trends regarding Erroneous and Missed Predictions in Figure S2 and Figure S3, respectively.

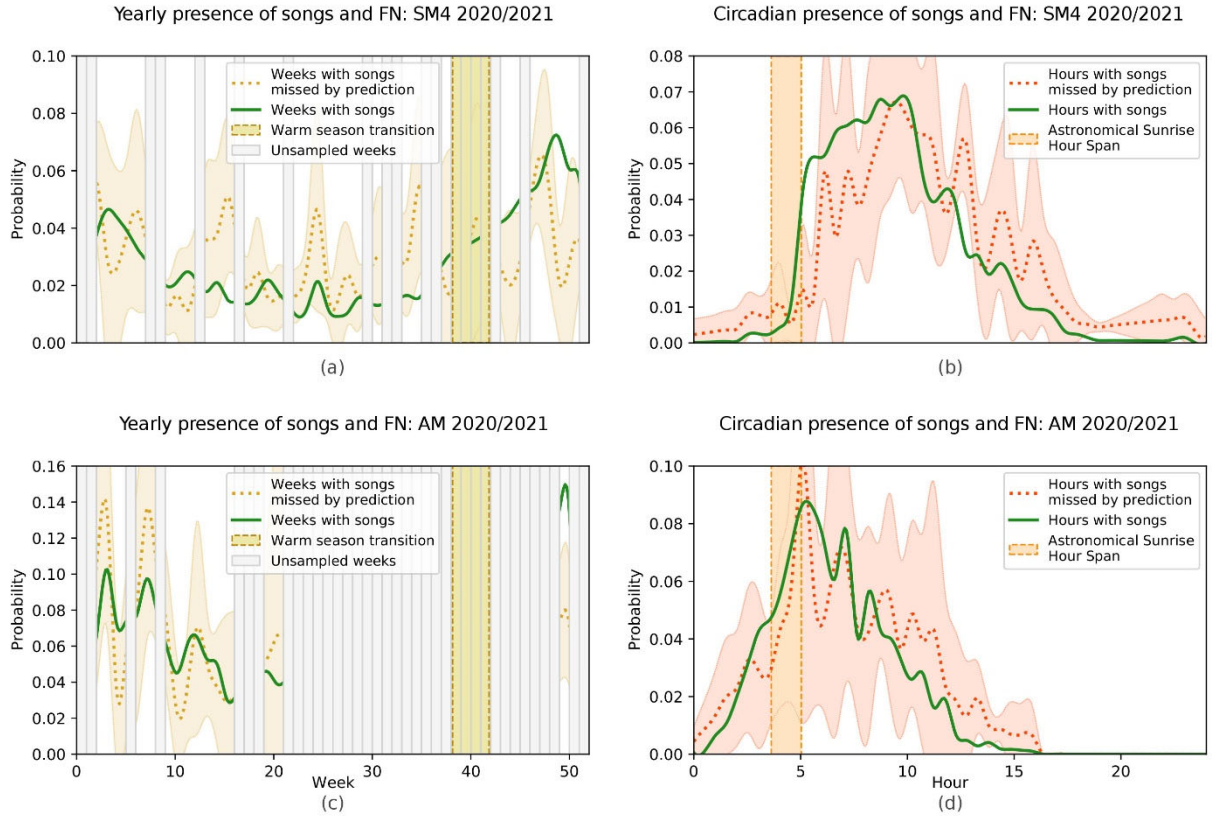

**Figure S3:** Yearly and circadian trends of the presence of songs and songs' which were not correctly classified by the prediction (False Negatives). **a)** and **b)** report data for the SM4 2020/2021 dataset; **c)** and **d)** report data for the AM 2020/2021 dataset. We considered a week unsampled if less than 250 recordings ( $\approx 40$  hours) were present; we did not use recordings of unsampled weeks to compute the probabilities for plots **a)** and **c)**, related to yearly trends, while we did employ all recordings for plots **b)** and **d)**, related to circadian trends. In the plots representing the yearly trend, we highlighted the typical period that presents a transition between the cold and the warm season [35], while for those concerning the circadian trends, we highlighted the astronomical sunrise hour span [54]. Dotted lines and shaded areas represent respectively the mean and the area comprise between three standard deviations obtained from the ten iterations of cross-validation. We reported the trends regarding Erroneous and Missed Predictions in Figure S2 and Figure S3, respectively.

**Table S1.** The name of the sites and the label we used to display them in Figure 2; for each site, we reported the coordinates, average number of recordings, average song occurrence, and average recall; we highlighted the average number of recordings when  $>250$ , i.e. the threshold we chose to display them on the graph. We reported data relative to the three test sets.

| Site         | Label | Coordinates              | Average number of recordings | Average song occurrence | Average recall |
|--------------|-------|--------------------------|------------------------------|-------------------------|----------------|
| AM 2019      |       |                          |                              |                         |                |
| Hapalemur    | a     | 18°57'24" S, 48°27'41" E | 451                          | 0.06                    | 0.69           |
| Vonondrozona | b     | 18°58'17" S, 48°27'40" E | 527                          | 0.16                    | 0.9            |

|                      |   |                          |             |      |      |
|----------------------|---|--------------------------|-------------|------|------|
| Quatres Chemins      | c | 18°58'12" S, 48°27'55" E | <b>355</b>  | 0.11 | 0.86 |
| Aye Aye              | d | 18°58'35" S, 48°28'16" E | <b>268</b>  | 0.12 | 0.86 |
| Beovitra             | e | 18°59'08" S, 48°27'41" E | <b>434</b>  | 0.14 | 0.79 |
| Petite Bellevue      |   | 18°58'47" S, 48°28'00" E | 159         | 0.06 | 0.81 |
| Apakambombaza        |   | 18°58'20" S, 48°28'20" E | 74          | 0.16 | 0.64 |
| Varecia (GR1)        |   | 18°58'30" S, 48°27'46" E | 41          | 0.29 | 0.84 |
| Varecia (GR3)        |   | 18°58'06" S, 48°27'30" E | 101         | 0.10 | 0.09 |
| Bevorondreo          |   | 18°58'41" S, 48°28'13" E | 97          | 0.14 | 0.89 |
| Grotte New           |   | 18°57'42" S, 48°27'11" E | 171         | 0.23 | 0.79 |
| Maromitety           |   | 18°59'00" S, 48°28'02" E | 133         | 0.29 | 0.81 |
| <b>AM 2020/2021</b>  |   |                          |             |      |      |
| Pique De Maromizaha  | f | 18°57'54" S, 48°27'34" E | <b>1981</b> | 0.08 | 0.89 |
| Andasy Ny Bile       | g | 18°58'29" S, 48°27'33" E | <b>2088</b> | 0.12 | 0.90 |
| Indri Groupes        | h | 18°58'51" S, 48°27'46" E | <b>2069</b> | 0.10 | 0.80 |
| Bevorondreo          | i | 18°58'41" S, 48°28'13" E | <b>2191</b> | 0.06 | 0.85 |
| Maromitety           | j | 18°59'00" S, 48°28'02" E | <b>1692</b> | 0.11 | 0.91 |
| Beovitra             |   | 18°59'08" S, 48°27'41" E | 108         | 0.20 | 0.92 |
| <b>SM4 2020/2021</b> |   |                          |             |      |      |
| Vonondrozona         | k | 18°58'17" S, 48°27'40" E | <b>3790</b> | 0.10 | 0.92 |
| Aye Aye              | l | 18°58'35" S, 48°28'16" E | <b>6728</b> | 0.09 | 0.72 |
| Petite Bellevue      | m | 18°58'47" S, 48°28'00" E | <b>3769</b> | 0.12 | 0.82 |
| Beovitra             | n | 18°59'08" S, 48°27'41" E | <b>6089</b> | 0.09 | 0.92 |
