# Supplementary figures and images for: There You Are! Automated Detection of Indris’ Songs on Features Extracted from Passive Acoustic Recordings
Source: MDPI journal article supplement (doi:10.3390/ani13020241), 2023-01-09

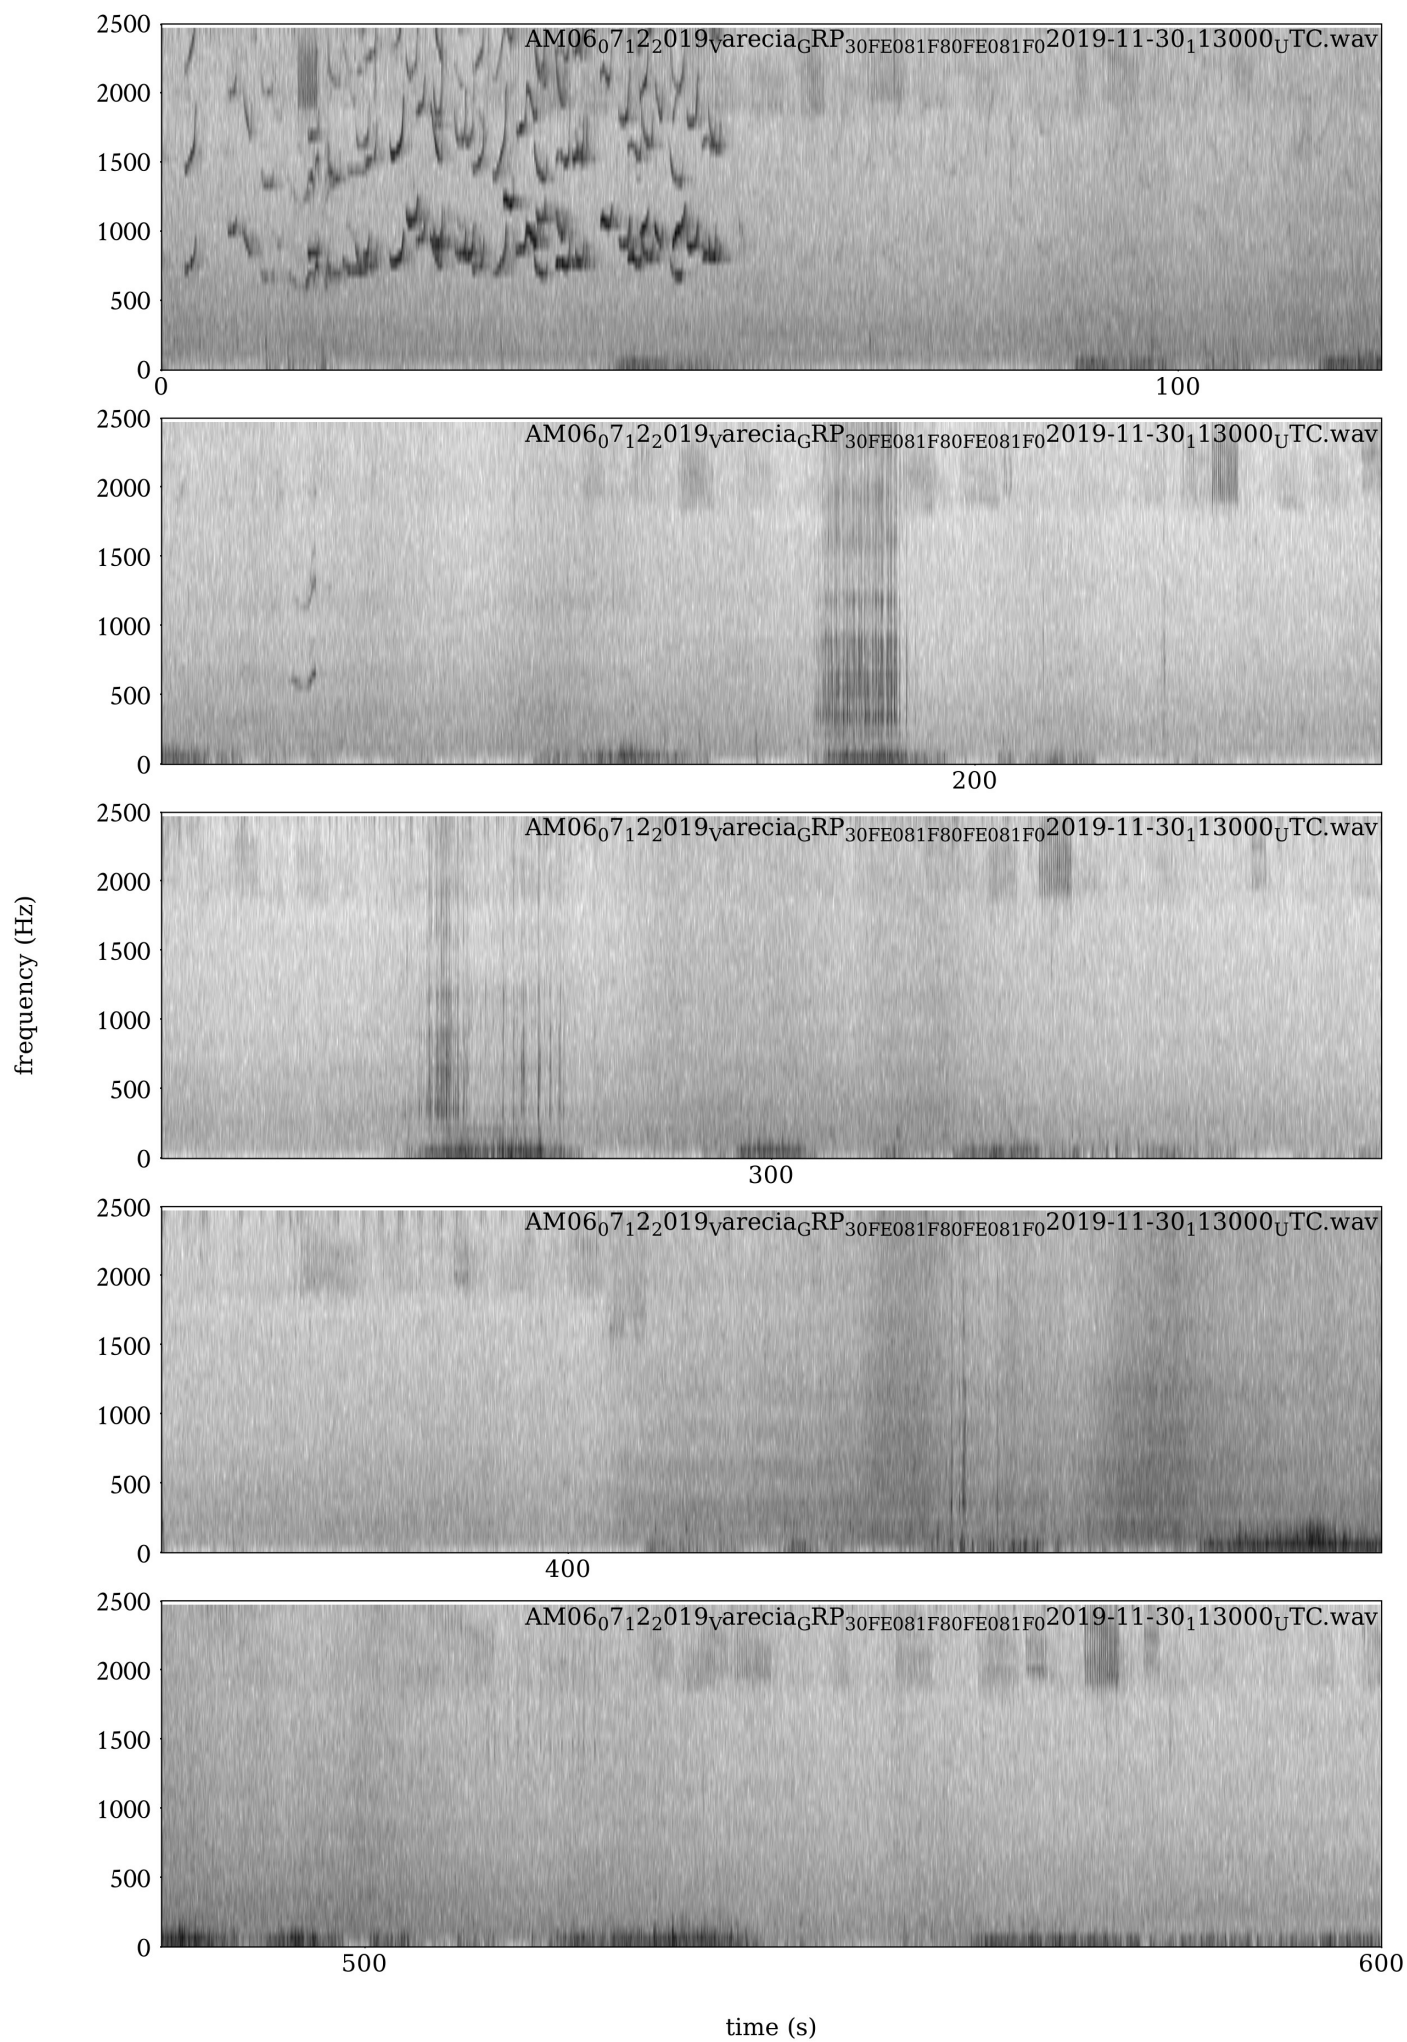

Supplement: s1 [file s1]
